# Supplementary material
Source: publisher figshare collection journal article supplement (https://acs.figshare.com/ndownloader/files/15509990)
Supplement: Supplementary file 1 [file 15509990]

## Supporting Information for

# Disphenoidal zero-dimensional lead, tin, and germanium halides: highly emissive singlet and triplet self-trapped excitons and X-ray scintillation

Viktoriia Morad,<sup>†‡</sup> Yevhen Shynkarenko,<sup>†‡</sup> Sergii Yakunin,<sup>†‡</sup> Alexandra Brumberg,<sup>#</sup> Richard D. Schaller,<sup>#,§</sup> and Maksym V. Kovalenko<sup>†,‡,\*</sup>

<sup>†</sup> Laboratory of Inorganic Chemistry, Department of Chemistry and Applied Bioscience, ETH Zürich, Vladimir Prelog Weg 1, CH-8093 Zürich, Switzerland

<sup>‡</sup> Laboratory for Thin Films and Photovoltaics, Empa – Swiss Federal Laboratories for Materials Science and Technology, Überlandstrasse 129, CH-8600 Dübendorf, Switzerland

<sup>#</sup> Department of Chemistry, Northwestern University, 2145 Sheridan Rd, Evanston, IL 60208

<sup>§</sup> Center for Nanoscale Materials, Argonne National Laboratory, 9700 Cass Ave, Lemont, IL 60439

\*E-mail: [mvkovalenko@ethz.ch](mailto:mvkovalenko@ethz.ch)

## 1. Materials and Methods

**Chemicals.** Lead (II) bromide (98%, Acros Organics, 500 g), tin(II) bromide (99.5%, Alfa Aesar, 25 g), germanium(II) bromide (97%, Aldrich-Fine Chemicals, 5 g), tin(II) iodide (99%, Strem Chemicals, 25 g), 1-butyl-1-methylpiperidinium bromide, BmpipBr (>97%, TCI, 5g; 99%, IOLITEC, 50 g), 1-butyl-1-methylpiperidinium iodide, BmpipI (>98%, IOLITEC, 50 g), ethanol, EtOH (anhydrous, 99.8%, Acros Organics, 1 L), dimethylformamide, DMF (anhydrous, 99.8%, Sigma-Aldrich, 100 ml), diethylether, Et<sub>2</sub>O (99.5%, extra dry over molecular sieve, stabilized, AcroSeal, 100 ml) were used as received and  $\gamma$ -butyrolactone, GBL (99+%, Acros Organics, 1 L) was additionally dried under vacuum at 110 °C and stored in a glovebox.

**Bmpip<sub>2</sub>PbBr<sub>4</sub>** was prepared by dissolving PbBr<sub>2</sub> (36.7 mg, 0.1 mmol) and BmpipBr (0.4 mmol, 94.5 mg) in DMF (1 ml). Single crystals suitable for X-ray diffraction were grown by a slow diffusion of Et<sub>2</sub>O into DMF solution of precursors at room temperature. Crystals were washed with Et<sub>2</sub>O and vacuum-dried.

**Bmpip<sub>2</sub>SnBr<sub>4</sub>** was prepared by mixing hot solutions of SnBr<sub>2</sub> (0.4 mmol) and BmpipBr (0.8 mmol) in EtOH (2 ml). The resulting EtOH solution was cooled from 70 °C to room temperature slowly (~5 °C/hour) to form single crystals. The synthesis was carried out in the N<sub>2</sub>-filled glovebox with dry solvents. Single crystals were additionally washed with Et<sub>2</sub>O and dried under vacuum.

**Bmpip<sub>2</sub>GeBr<sub>4</sub>** was prepared by dissolving BmpipBr (1 mmol) and GeBr<sub>2</sub> (0.5 mmol) in EtOH (3 ml). Subsequent addition of 2 ml of Et<sub>2</sub>O resulted in the formation of the white precipitate. For single crystal growth, Et<sub>2</sub>O was carefully layered onto EtOH precursor solution and single crystals formed at the interface were collected and vacuum-dried.

**Bmpip<sub>2</sub>SnI<sub>4</sub>** was prepared by dissolving SnI<sub>2</sub> (1 mmol) and BmpipI (2 mmol) in hot GBL (4 ml). After addition of acetone, beige powder (red-luminescent under UV) was collected and vacuum-dried. If an aliquot of a stock GBL solution was set to slowly cool down to RT from 90 °C (~5 °C/hour), single crystals, suitable for X-ray structure determination, were collected.

It is important to mention that Bmpip<sub>2</sub>PbBr<sub>4</sub> is stable in ambient conditions displaying no signs of optical properties deterioration after over a year of storage. Bmpip<sub>2</sub>SnBr<sub>4</sub> is stable in ambient conditions for over a year but gradually loses QY due to Sn(II) oxidation. Bmpip<sub>2</sub>GeBr<sub>4</sub> can be exposed to ambient atmosphere for not more than a day before it completely loses its optical properties due to Ge(II) oxidation. Bmpip<sub>2</sub>SnI<sub>4</sub> is less stable than its Br-counterpart, and changes color to red upon brief exposure to air.

## 2. Characterization

**Melting points** of Bmpip<sub>2</sub>PbBr<sub>4</sub> and Bmpip<sub>2</sub>SnBr<sub>4</sub> were determined with BUCHI M-565 Melting point instrument.

**Powder X-ray diffraction** (XRD) patterns were collected in transmission (Debye-Scherrer geometry) with STADI P diffractometer (STOE & Cie GmbH), equipped with a silicon strip MYTHEN 1K Detector (Fa. DECTRIS) with a curved Ge (111)-Monochromator (CuK<sub>α1</sub>=1.54056 Å). For the measurement, a grounded powder was placed between the adhesive tape.

**Single-crystal XRD** measurements were conducted on Bruker Smart Platform diffractometer equipped with a Apex I CCD detector and molybdenum (MoK<sub>α</sub>=0.71073 Å) sealed tube as an X-ray source and Oxford Xcalibur S diffractometer equipped with Sapphire 3 CCD detector and molybdenum (MoK<sub>α</sub>=0.71073 Å) sealed tube as an X-ray source. Crystals were tip-mounted on a micromount with paraffin oil. The data were processed with Oxford Diffraction CrysAlis Pro software, structure solution and refinement was performed with SHELXS and SHELXL<sup>1</sup> respectively, imbedded in the Olex2<sup>2</sup> package.

The crystal structure of the synthesized compound was solved with direct methods, light elements (C, N) were located in the difference Fourier map, most of the positions of the cations were refined as rigid groups, and hydrogen atoms were placed at calculated positions. The crystallographic data for the reported Bmpip<sub>2</sub>MBr<sub>4</sub> (M = Ge, Sn, Pb) were deposited at the Cambridge Crystallographic Data Centre (CCDC) under the codes 1897911 (Bmpip<sub>2</sub>PbBr<sub>4</sub>), 1897912 (Bmpip<sub>2</sub>SnBr<sub>4</sub>), 1897913 (Bmpip<sub>2</sub>GeBr<sub>4</sub>).

**Photoluminescence emission and excitation steady-state spectra** were recorded either with FluoroMax4-Plus-P (Horiba Jobin Yvon) or Fluorolog 3 (Horiba Jobin Yvon), equipped with 150 W and 500 W Xenon lamps, respectively. For the Figures 2a-b and S6-8, steady-state PL spectra were collected from samples photoexcited by a 35 ps, 405 nm pulsed diode laser through a fiber optic to a thermoelectrically-cooled CCD.

**Temperature dependences of photoluminescence emission (PL) and excitation (PLE)** spectra were acquired with FluoTime 300 spectrometer from PicoQuant GmbH coupled with CS204 closed cycle helium cryostat from Advanced Research Systems. Excitation was provided by a Xe lamp (power of 300W), passed through a monochromator and cut at emission monochromator with a 400-nm longpass filter. The temperature of a sample was ramped with a speed of 2 K min<sup>-1</sup>. Spectra were corrected for the spectral sensitivity of the detector and spectral power density of the lamp. For Figures S6-S8, **streak-camera** temperature-dependent photoluminescence was obtained by mounting the samples in between two sapphires in a helium cryostat. Samples were excited at 300 nm with a repetition rate of 2 kHz. The pump beam was produced by frequency quadrupling the signal output at 1200 nm of an optical parametric amplifier that was pumped with 800 nm, 35 fs pulses of an amplified Ti:sapphire laser. The pump beam was filtered through a 275-375 nm bandpass filter and its power density was maintained at roughly 130  $\mu\text{J}/\text{cm}^2$ . Emission from the sample was filtered using two 320 nm longpass filters and directed into either a 0.3 m spectrograph with a thermoelectrically-cooled CCD (for static measurements) or to a 0.15 m spectrograph and a single photon-sensitive streak camera (for time-resolved measurements).

**Absolute quantum yields** were measured using a Quantaaurus-QY spectrometer from Hamamatsu in powder mode.

**Luminescence spectra under X-ray excitation** were measured with FluoTime 300 spectrometer from PicoQuant GmbH fiber coupled to the sample irradiated with Amptek Mini-X X-ray Ag tube (50kV, 79 $\mu\text{A}$ ). The obtained spectra were corrected to account for the sensitivity of the spectrometer and detector.

A photograph of the fluorescence under X-rays was obtained with Rayme DG-073B-DC X-ray tube as an excitation source (70kV, 1mA, 1.8s exposure time) synced to the Canon EOS 200D camera with Canon EF-S 60mm f/2.8 Macro lens and Hoya Pro 1 Digital UV 52mm filter (estimated cutoff wavelength of 390 nm). The sample was positioned at a  $\sim 15$  cm distance from the X-ray tube.

### 3. Computation details

Ground state electronic structures were calculated with DFT using Vienna ab-initio simulation package (VASP) code. The projector augmented wave (PAW)<sup>3</sup> potentials for atoms were used. For the generalized gradient approximation (GGA), the Perdew-Burke-Ernzerhof exchange-correlation functional (PBE)<sup>4</sup> was used. A correction for van der Waals interactions was implemented with DFT-D2 method of Grimme with a cutoff radius of 30 Å and damping parameter  $d = 20$ . A reduced unit cell (half the crystallographic unit cell) comprising two  $\text{MX}_4$  anions and four Bmpip cations was used for band structure and density of states (DOS) calculations. The atomic positions were optimized until the forces on atoms were smaller than 0.01 eV/Å. Band structure calculations were performed along the high-symmetry K-points path generated with the density of 20 points. Excited state geometry was calculated with DFT as implemented in the cp2k code. The kinetic energy cutoff of the plane-wave basis was 400 eV. The PAW method was used to describe the interaction between ions and electrons. To find the energy of the excited state, atomic positions were optimized with spin-unrestricted Kohn-Sham approach, setting the spin multiplicity to triplet.<sup>5</sup> Lattice parameters were fixed at the experimental values and atomic positions were optimized until the force on the atoms was smaller than 4.5E-04 Hartree/bohr (0.023 eV/Å). High-symmetry K-path search, band-structure and DOS plots were prepared using sumo toolkit.<sup>6</sup>

In addition, we have estimated the influence of spin-orbit coupling (SOC) inclusion and post-DFT Hartree-Fock/DFT hybrid functional + SOC treatment on the electronic structure of Bmpip<sub>2</sub>MBr<sub>4</sub>. Post-DFT Hartree-Fock/DFT hybrid functionals PBE0 and HSE06 with 25% of the exact exchange were used for this purpose.<sup>7</sup>

**Table S1.** Experimental melting points of Bmpip<sub>2</sub>MBr<sub>4</sub>.

|                                      |          |
|--------------------------------------|----------|
| Bmpip <sub>2</sub> PbBr <sub>4</sub> | 176.6 °C |
| Bmpip <sub>2</sub> SnBr <sub>4</sub> | 125.6 °C |

**Table S2.** Crystallographic data for Bmpip<sub>2</sub>PbBr<sub>4</sub>.

|                                             |                                                                   |
|---------------------------------------------|-------------------------------------------------------------------|
| Empirical formula                           | C <sub>20</sub> H <sub>44</sub> Br <sub>4</sub> N <sub>2</sub> Pb |
| Formula weight                              | 839.40                                                            |
| Temperature/K                               | 100                                                               |
| Crystal system                              | Monoclinic                                                        |
| Space group                                 | C2/c                                                              |
| a/Å                                         | 20.3640(9)                                                        |
| b/Å                                         | 8.4235(2)                                                         |
| c/Å                                         | 18.8888(9)                                                        |
| α/°                                         | 90                                                                |
| β/°                                         | 123.796(7)                                                        |
| γ/°                                         | 90                                                                |
| Volume/Å <sup>3</sup>                       | 2692.6(3)                                                         |
| Z                                           | 4                                                                 |
| ρ <sub>calc</sub> /cm <sup>3</sup>          | 2.071                                                             |
| μ/mm <sup>-1</sup>                          | 12.211                                                            |
| F(000)                                      | 1600.0                                                            |
| Crystal size/mm <sup>3</sup>                | 0.19 × 0.19 × 0.19                                                |
| Radiation                                   | MoKα (λ = 0.71073)                                                |
| 2θ range for data collection/°              | 4.724 to 62.948                                                   |
| Index ranges                                | -29 ≤ h ≤ 28, -11 ≤ k ≤ 12, -26 ≤ l ≤ 26                          |
| Reflections collected                       | 14568                                                             |
| Independent reflections                     | 4117 [R <sub>int</sub> = 0.0161, R <sub>sigma</sub> = 0.0123]     |
| Data/restraints/parameters                  | 4117/0/125                                                        |
| Goodness-of-fit on F <sup>2</sup>           | 1.079                                                             |
| Final R indexes [I ≥ 2σ (I)]                | R <sub>1</sub> = 0.0213, wR <sub>2</sub> = 0.0501                 |
| Final R indexes [all data]                  | R <sub>1</sub> = 0.0229, wR <sub>2</sub> = 0.0508                 |
| Largest diff. peak/hole / e Å <sup>-3</sup> | 0.74/-0.60                                                        |

**Table S3.** Crystallographic data for Bmpip<sub>2</sub>SnBr<sub>4</sub>.

|                                             |                                                                   |
|---------------------------------------------|-------------------------------------------------------------------|
| Empirical formula                           | C <sub>20</sub> H <sub>44</sub> Br <sub>4</sub> N <sub>2</sub> Sn |
| Formula weight                              | 750.90                                                            |
| Temperature/K                               | 100                                                               |
| Crystal system                              | Monoclinic                                                        |
| Space group                                 | C2/c                                                              |
| a/Å                                         | 20.122(3)                                                         |
| b/Å                                         | 8.4218(6)                                                         |
| c/Å                                         | 18.801(2)                                                         |
| α/°                                         | 90                                                                |
| β/°                                         | 123.374(17)                                                       |
| γ/°                                         | 90                                                                |
| Volume/Å <sup>3</sup>                       | 2660.7(7)                                                         |
| Z                                           | 4                                                                 |
| ρ <sub>calc</sub> /cm <sup>3</sup>          | 1.875                                                             |
| μ/mm <sup>-1</sup>                          | 6.977                                                             |
| F(000)                                      | 1472.0                                                            |
| Crystal size/mm <sup>3</sup>                | 0.19 × 0.19 × 0.18                                                |
| Radiation                                   | MoKα (λ = 0.71073)                                                |
| 2θ range for data collection/°              | 4.77 to 62.838                                                    |
| Index ranges                                | -29 ≤ h ≤ 28, -12 ≤ k ≤ 12, -27 ≤ l ≤ 27                          |
| Reflections collected                       | 14448                                                             |
| Independent reflections                     | 4061 [R <sub>int</sub> = 0.0278, R <sub>sigma</sub> = 0.0217]     |
| Data/restraints/parameters                  | 4061/0/125                                                        |
| Goodness-of-fit on F <sup>2</sup>           | 1.132                                                             |
| Final R indexes [I ≥ 2σ (I)]                | R <sub>1</sub> = 0.0339, wR <sub>2</sub> = 0.0739                 |
| Final R indexes [all data]                  | R <sub>1</sub> = 0.0396, wR <sub>2</sub> = 0.0758                 |
| Largest diff. peak/hole / e Å <sup>-3</sup> | 1.12/-0.54                                                        |

**Table S4.** Crystallographic data for Bmpip<sub>2</sub>GeBr<sub>4</sub>.

|                   |                                                                  |
|-------------------|------------------------------------------------------------------|
| Empirical formula | C <sub>20</sub> H <sub>44</sub> Br <sub>4</sub> GeN <sub>2</sub> |
| Formula weight    | 704.80                                                           |
| Temperature/K     | 122(3)                                                           |
| Crystal system    | Monoclinic                                                       |
| Space group       | C2/c                                                             |
| a/Å               | 20.0807(7)                                                       |
| b/Å               | 8.42480(10)                                                      |
| c/Å               | 18.3778(5)                                                       |
| α/°               | 90                                                               |

|                                                |                                                               |
|------------------------------------------------|---------------------------------------------------------------|
| $\beta/^\circ$                                 | 121.862(4)                                                    |
| $\gamma/^\circ$                                | 90                                                            |
| Volume/ $\text{\AA}^3$                         | 2640.61(16)                                                   |
| Z                                              | 4                                                             |
| $\rho_{\text{calc}}/\text{cm}^3$               | 2.216                                                         |
| $\mu/\text{mm}^{-1}$                           | 9.028                                                         |
| F(000)                                         | 1750.0                                                        |
| Crystal size/ $\text{mm}^3$                    | $0.19 \times 0.19 \times 0.19$                                |
| Radiation                                      | MoK $\alpha$ ( $\lambda = 0.71073$ )                          |
| 2 $\Theta$ range for data collection/ $^\circ$ | 4.776 to 61.822                                               |
| Index ranges                                   | $-27 \leq h \leq 28, -12 \leq k \leq 11, -26 \leq l \leq 25$  |
| Reflections collected                          | 20153                                                         |
| Independent reflections                        | 3856 [ $R_{\text{int}} = 0.0455, R_{\text{sigma}} = 0.0387$ ] |
| Data/restraints/parameters                     | 3856/0/125                                                    |
| Goodness-of-fit on $F^2$                       | 1.117                                                         |
| Final R indexes [ $I \geq 2\sigma(I)$ ]        | $R_1 = 0.0342, wR_2 = 0.0600$                                 |
| Final R indexes [all data]                     | $R_1 = 0.0471, wR_2 = 0.0638$                                 |
| Largest diff. peak/hole / $e \text{\AA}^{-3}$  | 0.66/-0.48                                                    |

**Table S5.** Crystallographic data for Bmpip<sub>2</sub>SnI<sub>4</sub>.

|                                                |                                                                  |
|------------------------------------------------|------------------------------------------------------------------|
| Empirical formula                              | C <sub>20</sub> H <sub>44</sub> I <sub>4</sub> N <sub>2</sub> Sn |
| Formula weight                                 | 938.86                                                           |
| Temperature/K                                  | 120                                                              |
| Crystal system                                 | monoclinic                                                       |
| Space group                                    | C2/c                                                             |
| a/ $\text{\AA}$                                | 21.201(3)                                                        |
| b/ $\text{\AA}$                                | 8.8184(6)                                                        |
| c/ $\text{\AA}$                                | 19.170(3)                                                        |
| $\alpha/^\circ$                                | 90                                                               |
| $\beta/^\circ$                                 | 122.421(18)                                                      |
| $\gamma/^\circ$                                | 90                                                               |
| Volume/ $\text{\AA}^3$                         | 3025.5(8)                                                        |
| Z                                              | 4                                                                |
| $\rho_{\text{calc}}/\text{cm}^3$               | 2.061                                                            |
| $\mu/\text{mm}^{-1}$                           | 4.935                                                            |
| F(000)                                         | 1760.0                                                           |
| Crystal size/ $\text{mm}^3$                    | $0.2 \times 0.2 \times 0.2$                                      |
| Radiation                                      | MoK $\alpha$ ( $\lambda = 0.71073$ )                             |
| 2 $\Theta$ range for data collection/ $^\circ$ | 4.552 to 62.574                                                  |
| Index ranges                                   | $-30 \leq h \leq 29, -12 \leq k \leq 12, -26 \leq l \leq 27$     |

|                                             |                                       |
|---------------------------------------------|---------------------------------------|
| Reflections collected                       | 15354                                 |
| Independent reflections                     | 4594 [Rint = 0.0525, Rsigma = 0.0314] |
| Data/restraints/parameters                  | 4594/0/126                            |
| Goodness-of-fit on F2                       | 1.125                                 |
| Final R indexes [ $I \geq 2\sigma(I)$ ]     | R1 = 0.0448, wR2 = 0.1076             |
| Final R indexes [all data]                  | R1 = 0.0504, wR2 = 0.1122             |
| Largest diff. peak/hole / e Å <sup>-3</sup> | 1.51/-1.11                            |

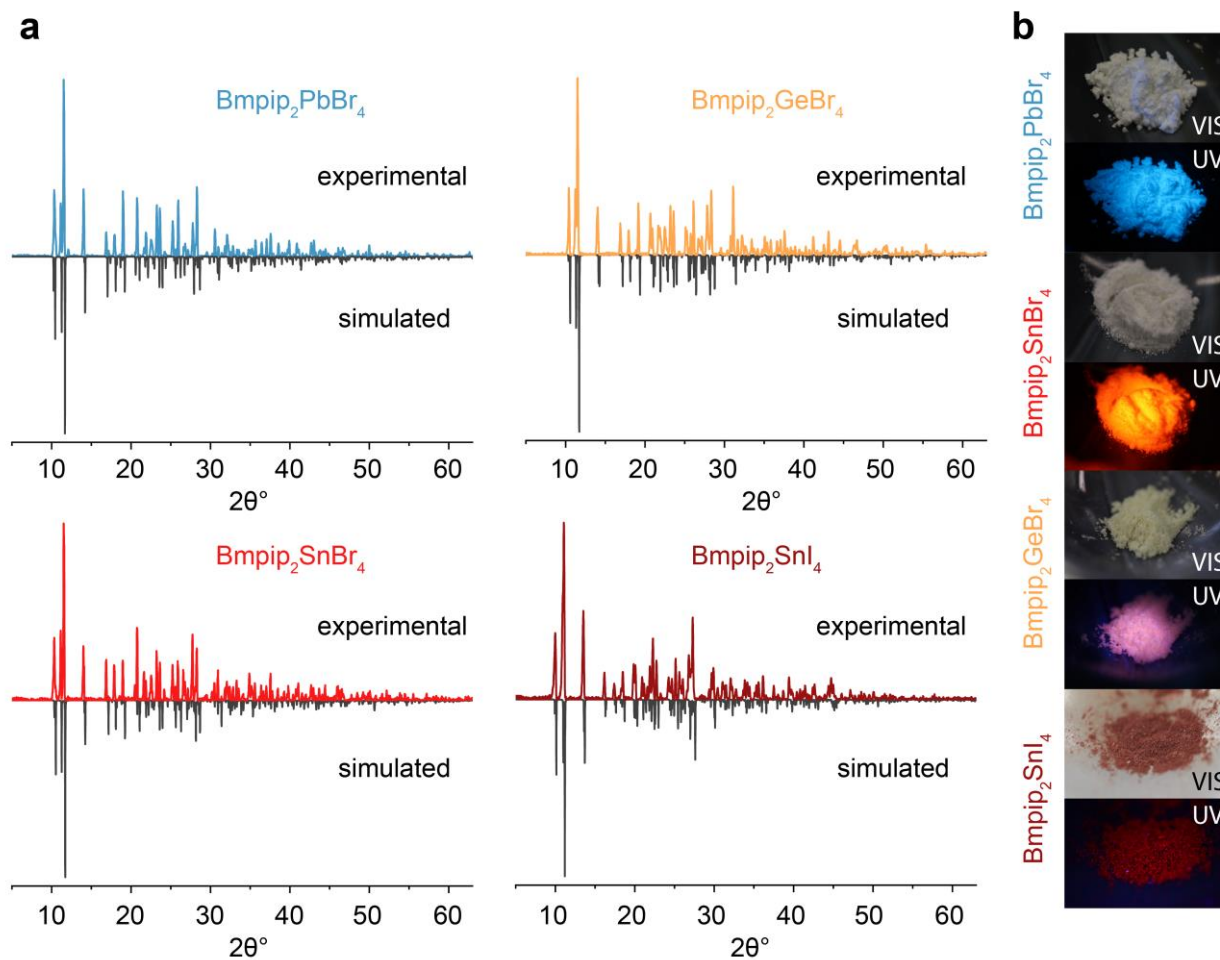

**Figure S1.** (a) Experimental and simulated powder XRD patterns for  $\text{Bmpip}_2\text{SnBr}_4$ ,  $\text{Bmpip}_2\text{PbBr}_4$ ,  $\text{Bmpip}_2\text{SnI}_4$  and  $\text{Bmpip}_2\text{GeBr}_4$ . (b) Photos of powders under ambient and UV irradiation.

**Table S6.** Bond lengths for Bmpip<sub>2</sub>PbBr<sub>4</sub>.

| Atom  | Atom   | Length/Å  |
|-------|--------|-----------|
| Pb(1) | Br(1)  | 3.0087(3) |
| Pb(1) | Br(1a) | 3.0088(3) |
| Pb(1) | Br(2)  | 2.7258(3) |
| Pb(1) | Br(2a) | 2.7258(3) |

**Table S7.** Bond Lengths for Bmpip<sub>2</sub>SnBr<sub>4</sub>

| Atom  | Atom   | Length/Å  |
|-------|--------|-----------|
| Sn(1) | Br(1)  | 2.9523(4) |
| Sn(1) | Br(1a) | 2.9523(4) |
| Sn(1) | Br(2)  | 2.6430(6) |
| Sn(1) | Br(2a) | 2.6430(6) |

**Table S8.** Bond Lengths for Bmpip<sub>2</sub>GeBr<sub>4</sub>

| Atom  | Atom   | Length/Å  |
|-------|--------|-----------|
| Ge(1) | Br(2)  | 2.4716(3) |
| Ge(1) | Br(2a) | 2.4716(3) |
| Ge(1) | Br(1)  | 2.8679(4) |
| Ge(1) | Br(2)  | 2.8679(4) |

**Table S9.** Bond Lengths for Bmpip<sub>2</sub>SnI<sub>4</sub>

| Atom  | Atom  | Length/Å  |
|-------|-------|-----------|
| Sn(1) | I(1)  | 3.1780(7) |
| Sn(1) | I(1a) | 3.1780(7) |
| Sn(1) | I(2)  | 2.8610(5) |
| Sn(1) | I(2a) | 2.8611(5) |

**Table S10.** Bond Angles for Bmpip<sub>2</sub>PbBr<sub>4</sub>

| Atom   | Atom  | Atom   | Angle/°     |
|--------|-------|--------|-------------|
| Br(1)  | Pb(1) | Br(1a) | 179.409(10) |
| Br(2)  | Pb(1) | Br(1)  | 92.005(8)   |
| Br(2a) | Pb(1) | Br(1)  | 88.377(8)   |
| Br(2)  | Pb(1) | Br(1a) | 88.378(8)   |
| Br(2a) | Pb(1) | Br(1a) | 92.005(8)   |
| Br(2)  | Pb(1) | Br(2a) | 99.429(13)  |



**Table S11.** Bond Angles for Bmpip<sub>2</sub>SnBr<sub>4</sub>

| Atom   | Atom  | Atom   | Angle/°     |
|--------|-------|--------|-------------|
| Br(1a) | Sn(1) | Br(1)  | 176.419(15) |
| Br(2)  | Sn(1) | Br(1a) | 87.177(12)  |
| Br(2)  | Sn(1) | Br(1)  | 90.479(12)  |
| Br(2a) | Sn(1) | Br(1)  | 87.177(12)  |
| Br(2a) | Sn(1) | Br(1a) | 90.477(13)  |
| Br(2)  | Sn(1) | Br(2a) | 98.21(2)    |

**Table S12.** Bond Angles for Bmpip<sub>2</sub>SnI<sub>4</sub>

| Atom  | Atom  | Atom  | Angle/°     |
|-------|-------|-------|-------------|
| I(1)  | Sn(1) | I(1a) | 179.245(19) |
| I(2a) | Sn(1) | I(1)  | 90.575(18)  |
| I(2a) | Sn(1) | I(1a) | 88.930(18)  |
| I(2)  | Sn(1) | I(1)  | 88.930(19)  |
| I(2)  | Sn(1) | I(1a) | 90.575(19)  |
| I(2)  | Sn(1) | I(2a) | 98.12(2)    |

**Table S13.** Bond Angles for Bmpip<sub>2</sub>GeBr<sub>4</sub>

| Atom   | Atom  | Atom   | Angle/°     |
|--------|-------|--------|-------------|
| Br(1)  | Ge(1) | Br(1a) | 177.010(17) |
| Br(2)  | Ge(1) | Br(2a) | 100.068(17) |
| Br(2)  | Ge(1) | Br(1)  | 89.418(13)  |
| Br(2a) | Ge(1) | Br(1a) | 89.418(13)  |
| Br(2)  | Ge(1) | Br(1a) | 90.502(13)  |
| Br(2a) | Ge(1) | Br(1)  | 90.502(13)  |

**Table S14.** Summary of the optical properties of Bmpip<sub>2</sub>MBr<sub>4</sub>

| Compound                             | Emission /nm | Excitation /nm | Stokes shift /nm | $\tau$      | $\phi$ |
|--------------------------------------|--------------|----------------|------------------|-------------|--------|
| Bmpip <sub>2</sub> PbBr <sub>4</sub> | 470          | 347            | 123              | 66 ns       | 24 %   |
| Bmpip <sub>2</sub> SnBr <sub>4</sub> | 666          | 340            | 326              | 4 $\mu$ s   | 75 %   |
| Bmpip <sub>2</sub> GeBr <sub>4</sub> | 670          | 340            | 330              | 1.5 $\mu$ s | <1 %   |
| Bmpip <sub>2</sub> SnI <sub>4</sub>  | 730          | 410            | 360              | 1.9 $\mu$ s | 35 %   |

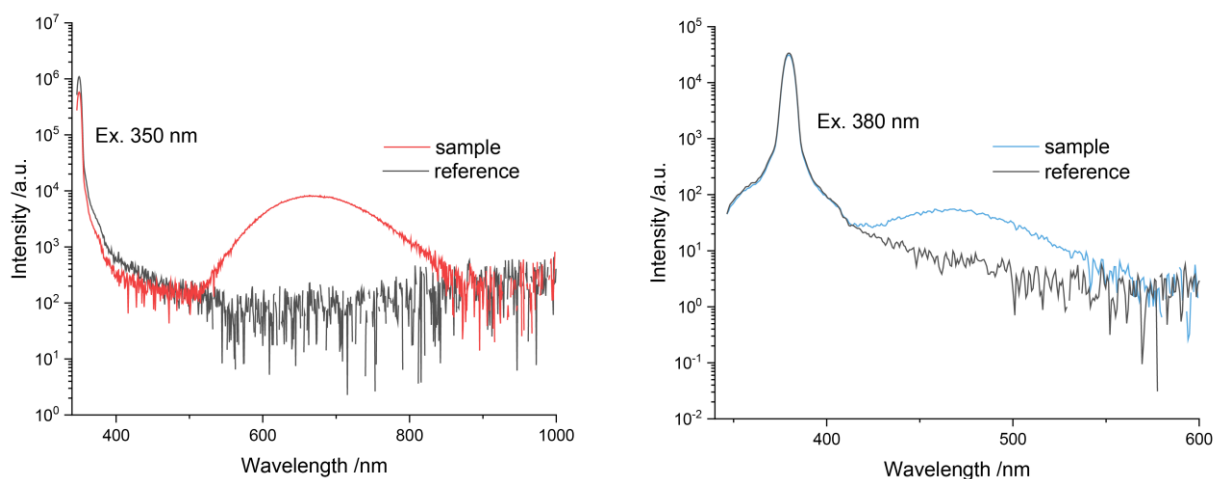

**Figure S2.** Photoluminescence measurement spectra for Bmpip<sub>2</sub>SnBr<sub>4</sub> (red) and Bmpip<sub>2</sub>PbBr<sub>4</sub> (blue).

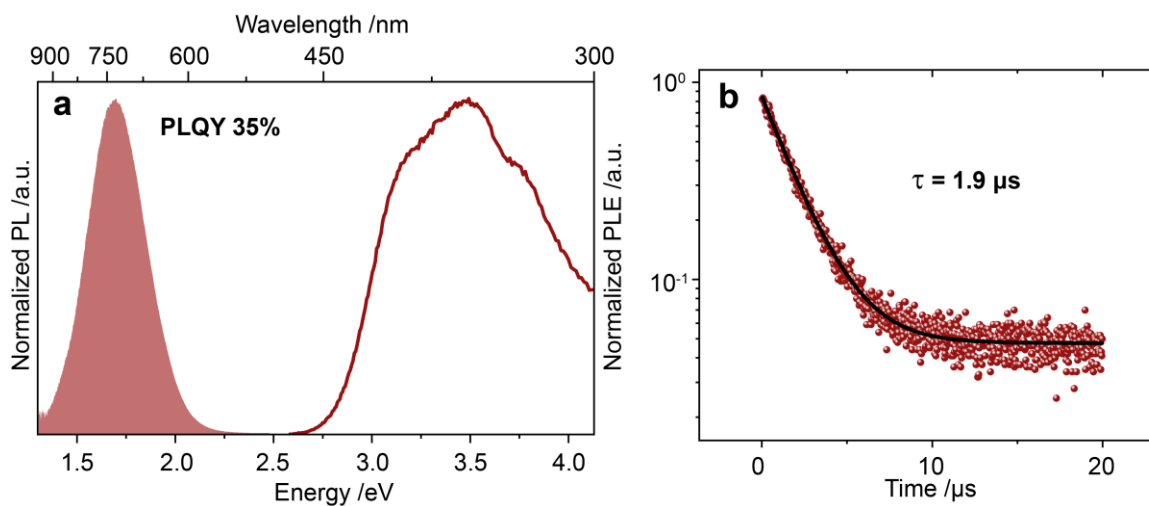

**Figure S3.** (a) Photoluminescence emission and excitation spectra of Bmpip<sub>2</sub>SnI<sub>4</sub>. (b) Photoluminescence decay of Bmpip<sub>2</sub>SnI<sub>4</sub> and monoexponential fitting.

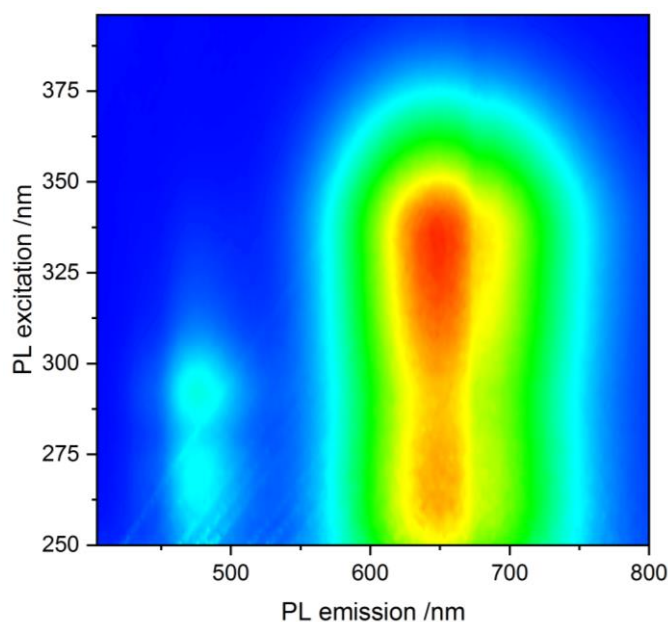

**Figure S4.** 2D PL vs. PLE map for Bmpip<sub>2</sub>SnBr<sub>4</sub> at room temperature. The intensity normalized between 0 and 1. The map shows independent excitation spectra for singlet and triplet emission: triplet emission can be accessed without exciting the singlet band.

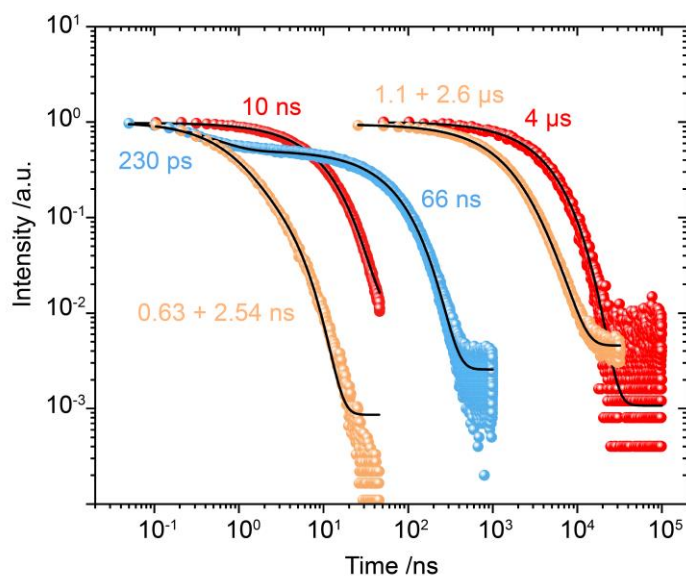

**Figure S5.** Room-temperature luminescence decay for Bmpip<sub>2</sub>PbBr<sub>4</sub> (two spectrally overlapping triplets, blue curve), Bmpip<sub>2</sub>SnBr<sub>4</sub> (singlet and triplet, red curves) and Bmpip<sub>2</sub>GeBr<sub>4</sub> (singlet and triplet, biexponential, orange curves). Singlet emission from Bmpip<sub>2</sub>PbBr<sub>4</sub> is observed only with streak camera (see Figure S9) due to its fast decay (sub-50 ps). Black curves show exponential fit.

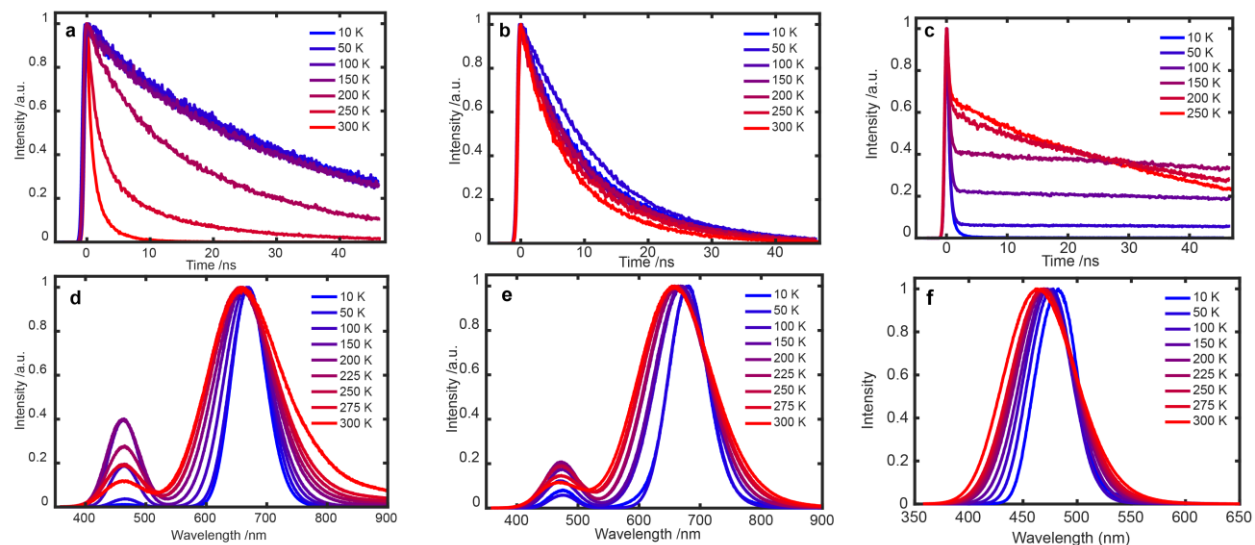

**Figure S6.** (a-b) Temperature-dependent emission decay curves for the singlet emission at 475 nm for Bmpip<sub>2</sub>GeBr<sub>4</sub> and Bmpip<sub>2</sub>SnBr<sub>4</sub>. (c) Temperature-dependent emission decay curves for the emission peak at 470 nm for Bmpip<sub>2</sub>PbBr<sub>4</sub>. (d-f) Temperature-dependent normalized steady-state PL spectra under 310 nm laser excitation for Bmpip<sub>2</sub>GeBr<sub>4</sub>, Bmpip<sub>2</sub>SnBr<sub>4</sub>, Bmpip<sub>2</sub>PbBr<sub>4</sub>.

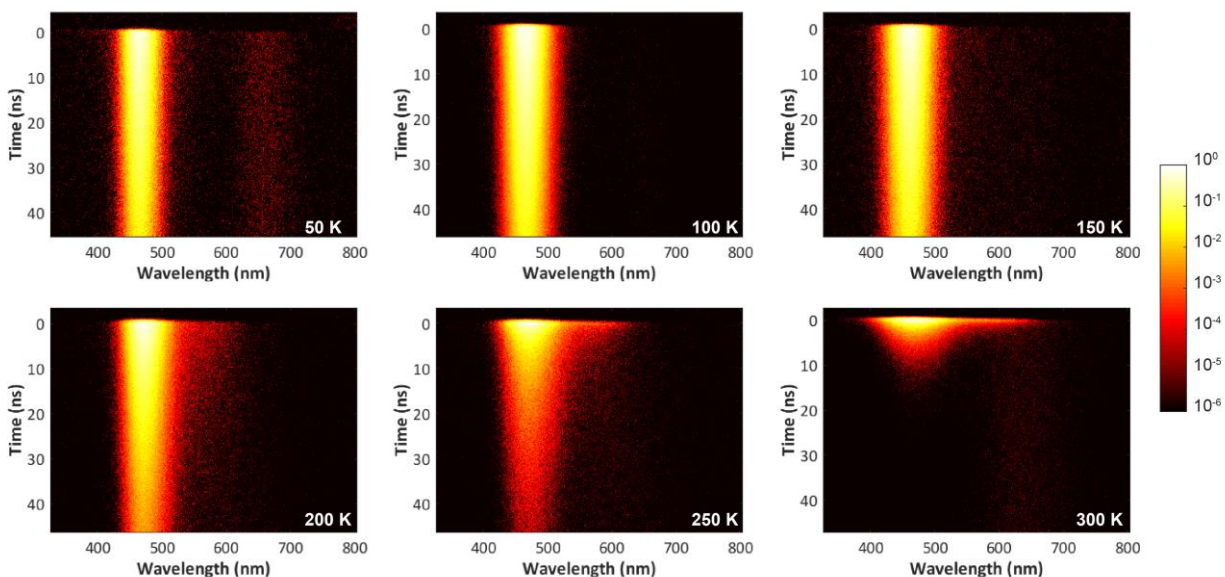

**Figure S7.** Time-resolved emission for Bmpip<sub>2</sub>GeBr<sub>4</sub>, collected with a streak camera at different temperatures.

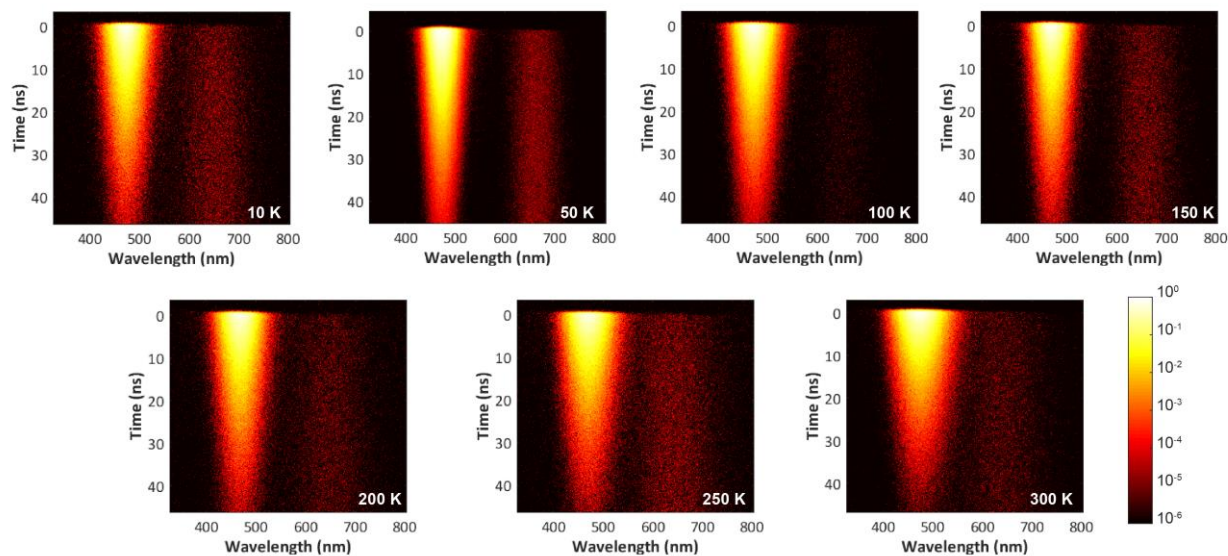

**Figure S8.** Time-resolved emission for Bmpip<sub>2</sub>SnBr<sub>4</sub> collected with a streak camera at different temperatures.

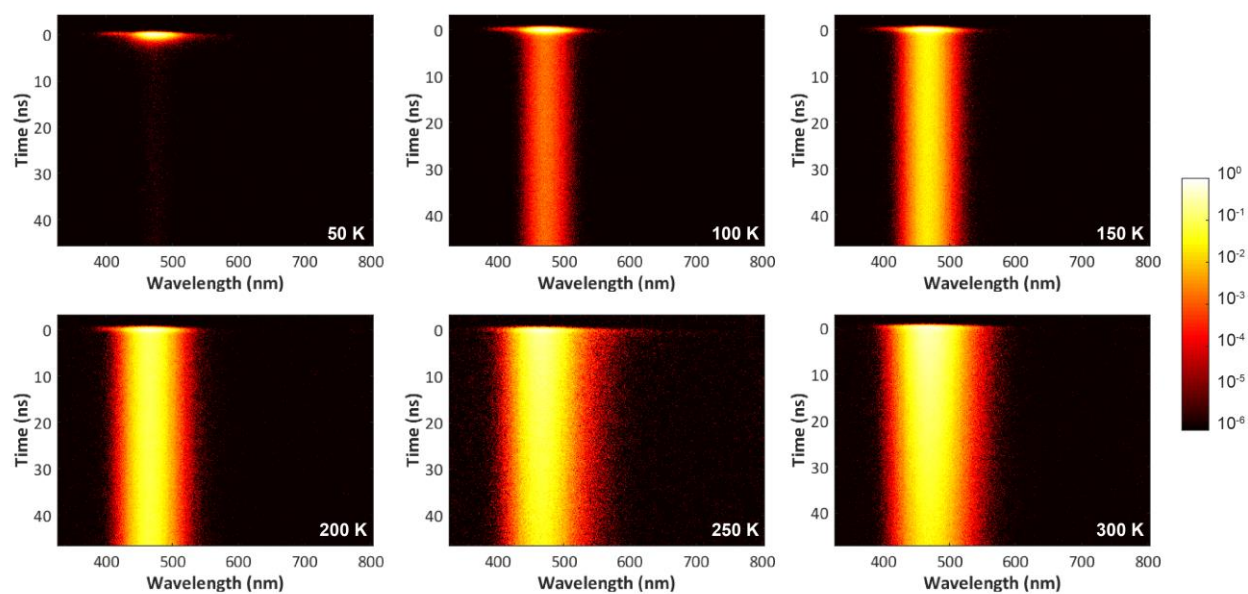

**Figure S9.** Time-resolved emission for Bmpip<sub>2</sub>PbBr<sub>4</sub>, collected with a streak camera at different temperatures in the 50 ns time window.

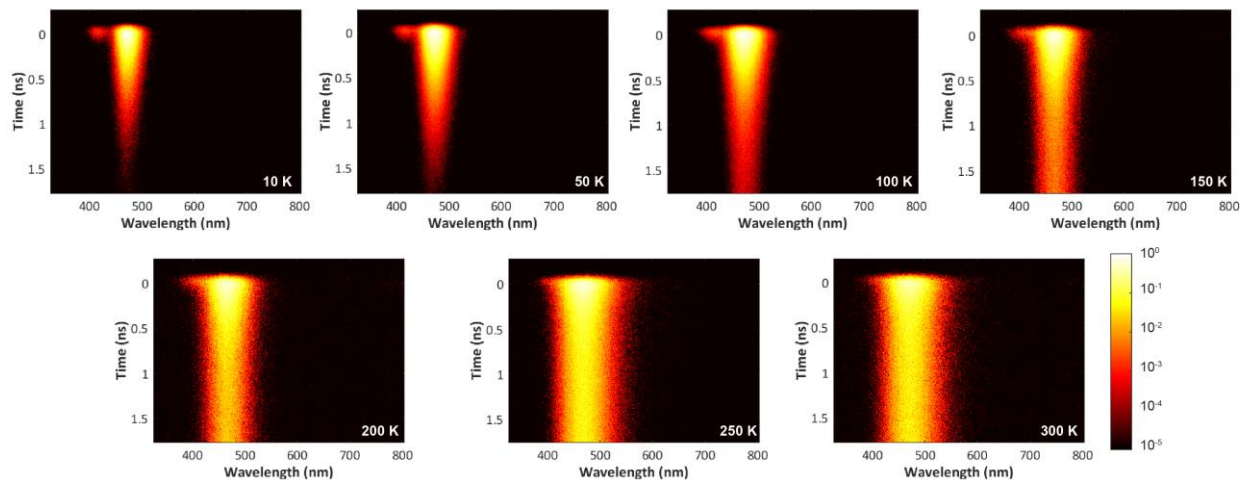

**Figure S10.** Time-resolved emission for Bmpip<sub>2</sub>PbBr<sub>4</sub>, collected with a streak camera at different temperatures in the 2 ns time window.

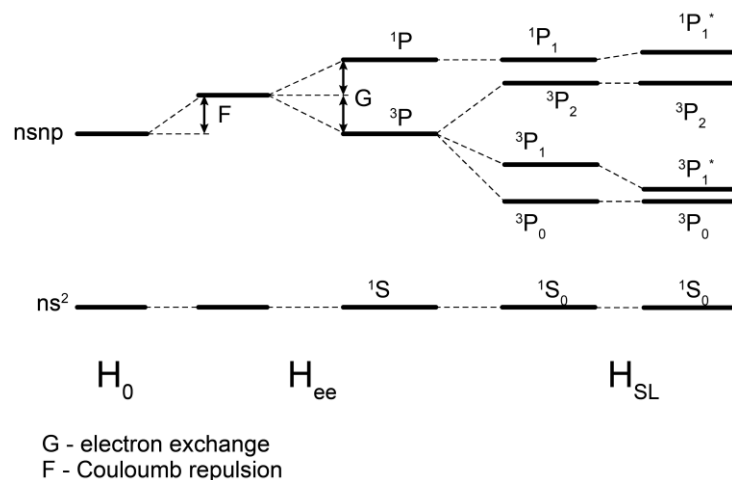

**Scheme S1.** Energy level diagram for an isolated  $ns^2$  ion. Electron-electron interactions result in the Coulomb repulsion  $F$  and exchange interaction  $G$ . The diagonal terms in the spin-orbit coupling Hamiltonian  $H_{SL}$  (Russell-Saunders coupling) split the  $^3P$  term into its three components with  $J=0,1,2$ . The off-diagonal elements of  $H_{SL}$  mix  $^1P_1$  and  $^3P_1$ .<sup>8</sup>

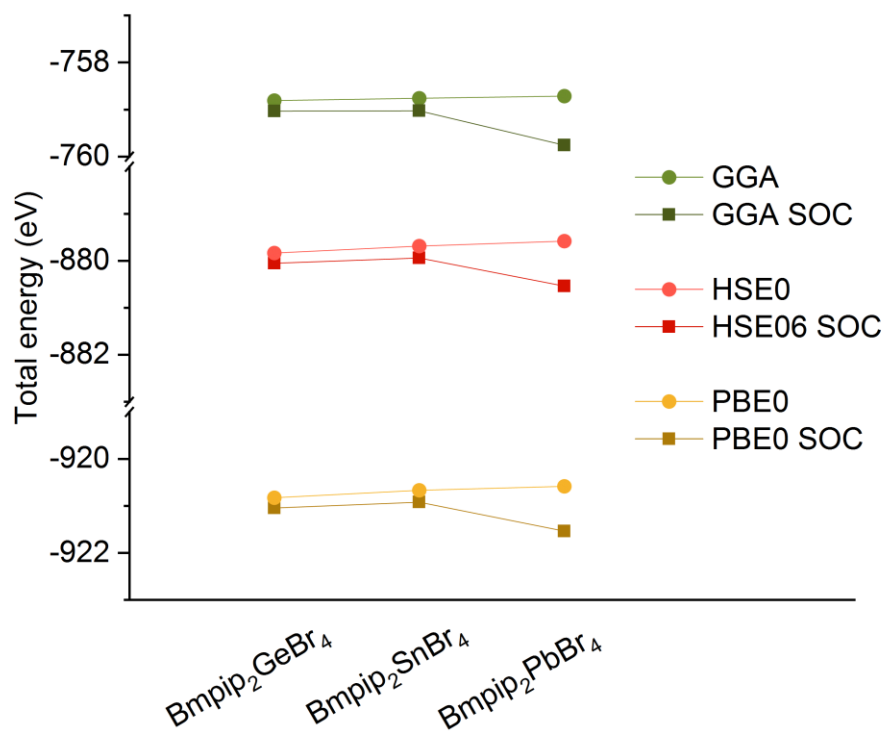

**Figure S11.** Comparison of total energy for Bmpip<sub>2</sub>GeBr<sub>4</sub>, Bmpip<sub>2</sub>SnBr<sub>4</sub> and Bmpip<sub>2</sub>PbBr<sub>4</sub> calculated with different functionals (GGA (PBE) or hybrid (PBE0 and HSE06)) without and with inclusion of SOC. The SOC inclusion in calculation only influences the total energy in case of Bmpip<sub>2</sub>PbBr<sub>4</sub>.



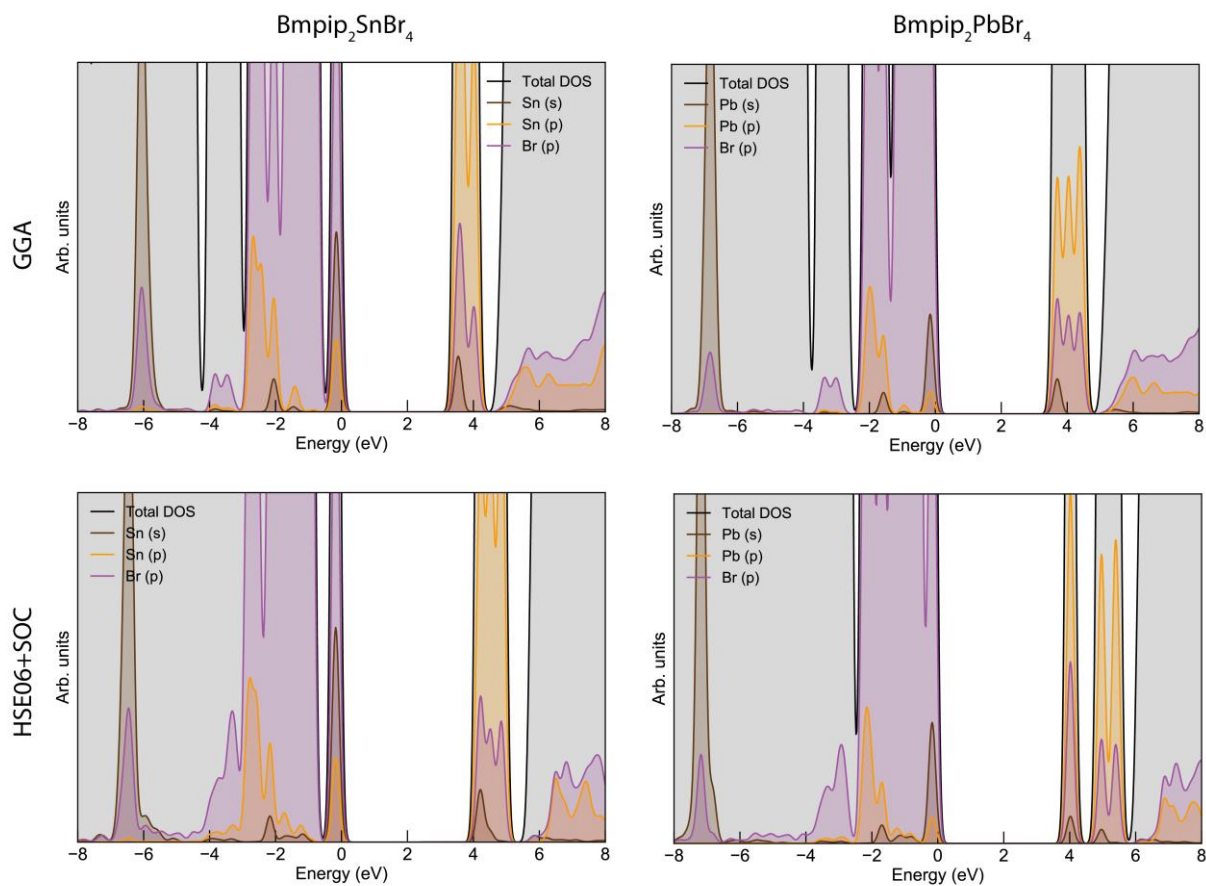

**Figure S12.** Comparison of DOS for Bmpip<sub>2</sub>SnBr<sub>4</sub> and Bmpip<sub>2</sub>PbBr<sub>4</sub> calculated with GGA and with HSE06+SOC. The contribution of metal *s*-orbitals to the top of the VB increases both for Sn and Pb.



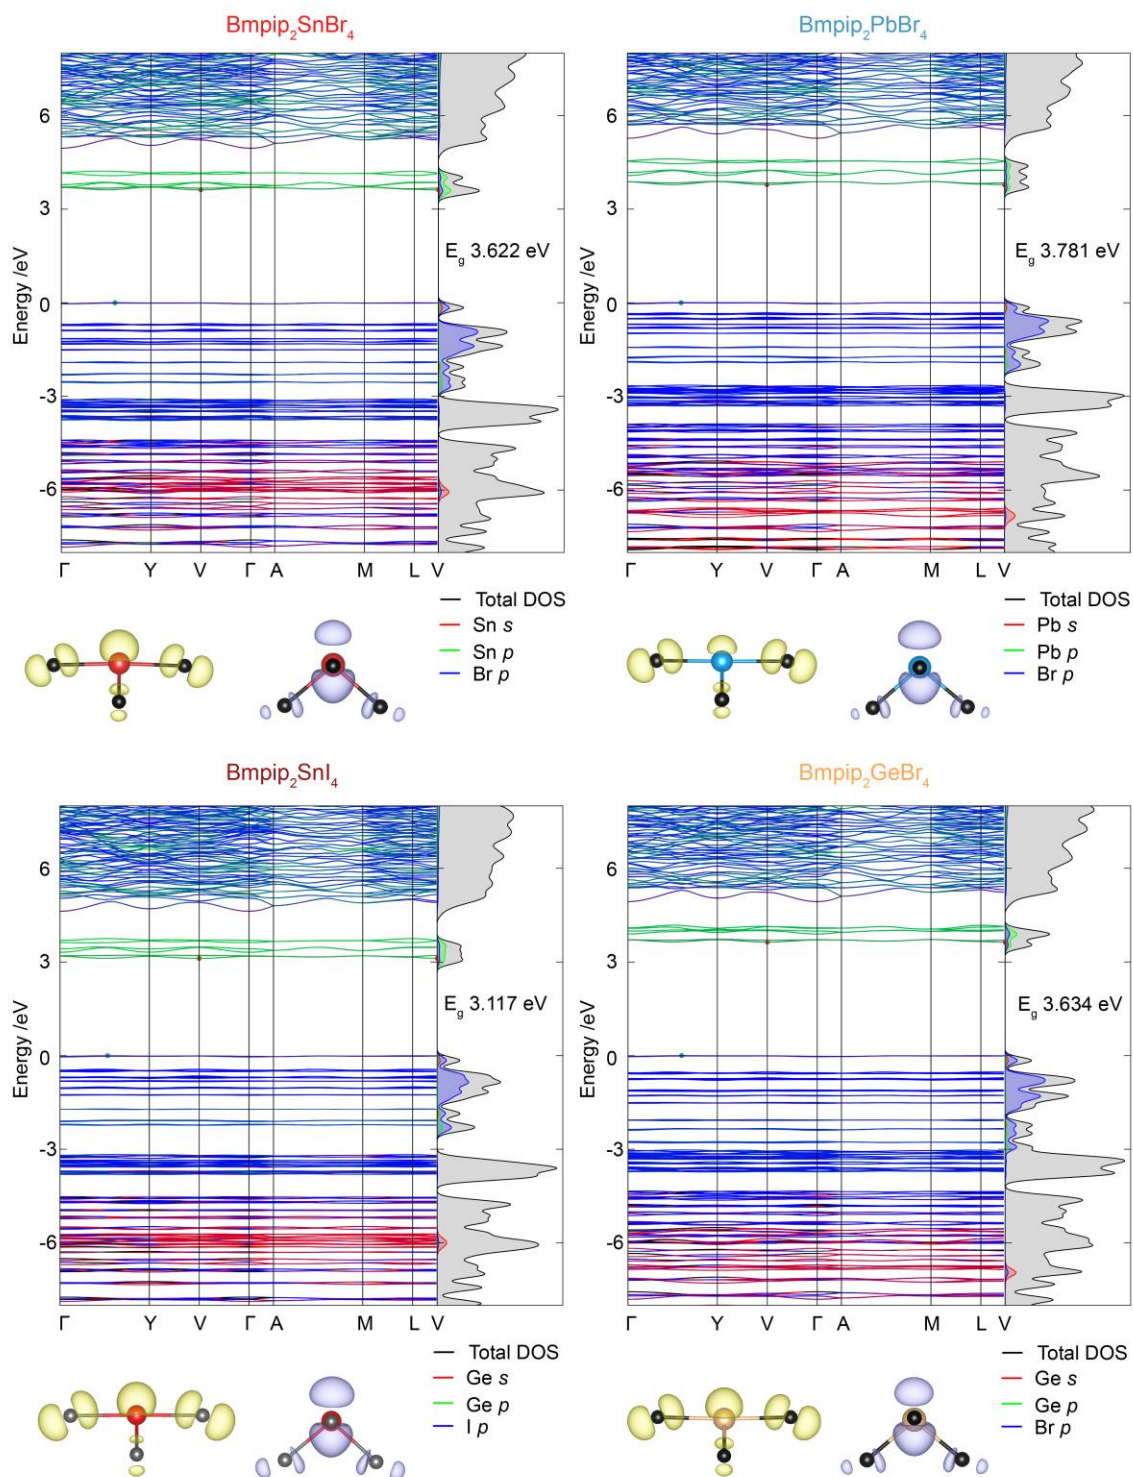

**Figure S13.** Orbital projected band structure and DOS of  $\text{Bmpip}_2\text{SnBr}_4$ ,  $\text{Bmpip}_2\text{PbBr}_4$ ,  $\text{Bmpip}_2\text{SnI}_4$  and  $\text{Bmpip}_2\text{GeBr}_4$ . Yellow contour plot shows atom-projected hole wave-function localization at the top of the valence band between  $\Gamma$  and Y; purple contour plot shows electron wave-function localization at the bottom of the conduction band at point V.

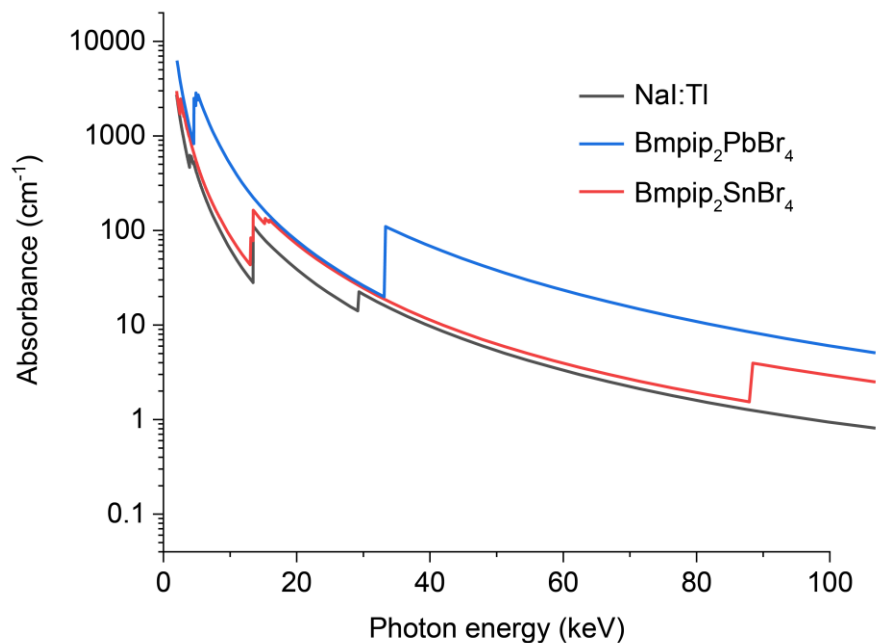

**Figure S14.** X-ray absorbance vs. photon energy for NaI, Bmpip<sub>2</sub>PbBr<sub>4</sub>, Bmpip<sub>2</sub>SnBr<sub>4</sub>. Calculated using NIST X-ray form factor, attenuation, and scattering tables.<sup>9</sup>

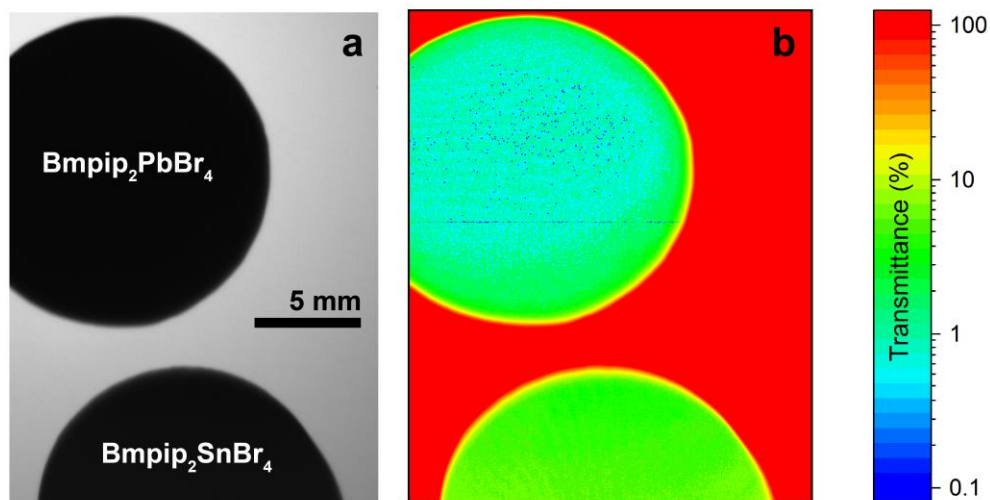

**Figure S15.** (a) Transmission image in X-rays of Bmpip<sub>2</sub>PbBr<sub>4</sub> and Bmpip<sub>2</sub>SnBr<sub>4</sub> obtained with RadEye HR sensor module. (b) Calculated transmittance, showing that pellets absorb more than 90% of the incident X-ray.

## References

1. Sheldrick, G. M., Crystal Structure Refinement with SHELXL. *Acta Crystallogr. C* **2015**, *71*, 3-8.
2. Dolomanov, O. V.; Bourhis, L. J.; Gildea, R. J.; Howard, J. A. K.; Puschmann, H., OLEX2: a Complete Structure Solution, Refinement and Analysis Program. *J. Appl. Crystallogr.* **2009**, *42*, 339-341.
3. Blochl, P. E., Projector Augmented-Wave Method. *Phys. Rev. B* **1994**, *50* (24), 17953-17979.
4. Perdew, J. P.; Burke, K.; Ernzerhof, M., Generalized Gradient Approximation Made Simple. *Phys. Rev. Lett.* **1997**, *78* (7), 1396-1396.
5. Gunnarsson, O.; Lundqvist, B. I., Exchange and Correlation in Atoms, Molecules, and Solids by Spin-Density Functional Formalism. *Phys. Rev. B* **1976**, *13* (10), 4274-4298.
6. M Ganose, A.; Jackson, A.; Scanlon, D., sumo: Command-Line Tools for Plotting and Analysis of Periodic ab Initio Calculations. *The Journal of Open Source Software* **2018**, *3*, 717.
7. (a) Krukau, A. V.; Vydrov, O. A.; Izmaylov, A. F.; Scuseria, G. E., Influence of the Exchange Screening Parameter on the Performance of Screened Hybrid Functionals. *J. Chem. Phys.* **2006**, *125* (22); (b) Perdew, J. P.; Ernzerhof, M.; Burke, K., Rationale for mixing exact exchange with density functional approximations. *J. Chem. Phys.* **1996**, *105* (22), 9982-9985.
8. Jacobs, P. W. M., Alkali-Halide Crystals Containing Impurity Ions with the  $ns^2$  Ground-State Electronic Configuration. *J. Phys. Chem. Solids* **1991**, *52* (1), 35-67.
9. Chantler, C. T., Detailed Tabulation of Atomic Form Factors, Photoelectric Absorption and Scattering Cross Section, and Mass Attenuation Coefficients in the Vicinity of Absorption Edges in the Soft X-ray ( $Z=30-36$ ,  $Z=60-89$ ,  $E=0.1$  keV-10 keV), Addressing Convergence Issues of Earlier Work. *J. Synchrotron Radiat.* **2001**, *8*, 1124-1124.
